# Supplementary material for: Small-molecule axon-polarization studies enabled by a shear-free microfluidic gradient generator
Source: Royal Society of Chemistry journal article supplement (doi:10.1039/c4lc00162a), 2014-01-01
Supplement: c4lc00162a1.pdf [file c4lc00162a1.pdf]

## Supplemental Information for:

# Small-molecule axon-polarization studies enabled by a shear-free microfluidic gradient generator

Hui Xu, Meghaan M. Ferreira, and Sarah C. Heilshorn\*

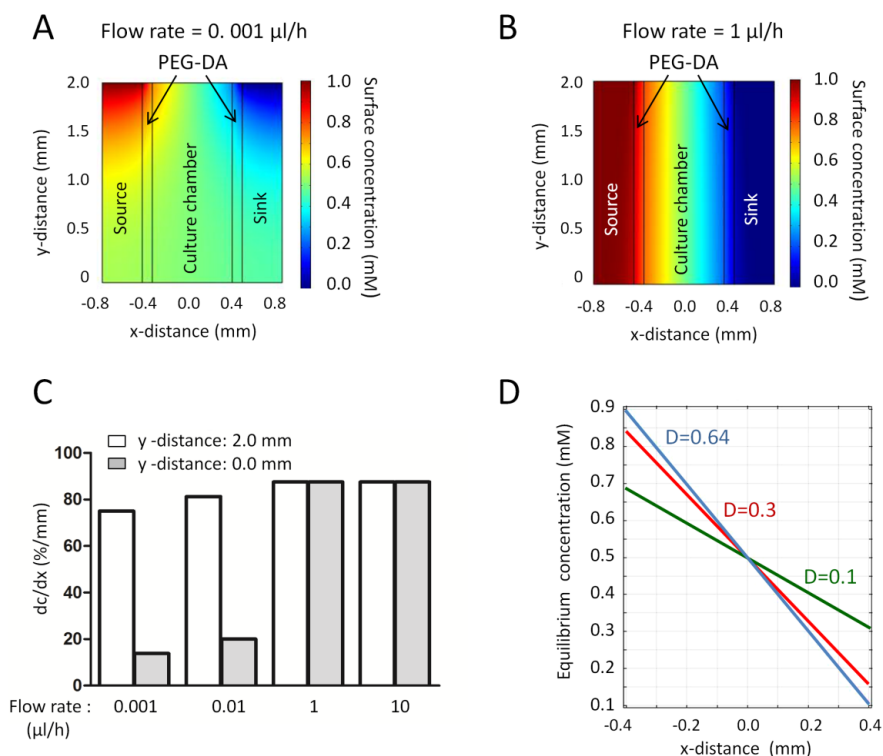

**Figure S1. Mathematical simulation of equilibrium gradients in the device.** **A.** With slow fluid perfusion (0.001  $\mu\text{l/h}$ ) in the side channels, the chemical concentration in the center cell culture chamber decreases along the direction of the flow, causing the concentration gradient ( $dC/dx$ ) to decrease along the y-distance. **B.** A high fluid perfusion rate (1  $\mu\text{l/h}$ ) in the side channels results in a constant chemical concentration along the direction of the flow and a uniform concentration gradient ( $dC/dx$ ) in the culture chamber. **C.** Equilibrium gradient ( $dC/dx$ ) at two positions along the y-distance ( $y = 0$  and 2 mm), for several different perfusion rates. **D.** Increasing diffusivity across the PEG hydrogel barrier (i.e., smaller molecules or hydrogels with larger mesh sizes) results in steeper equilibrium gradient slopes across the cell culture chamber.
